# Supplementary material for: Enhancement of the Colorectal Chemopreventive and Immunization Potential of Northern Thai Purple Rice Anthocyanin Using the Biotransformation by β-Glucosidase-Producing Lactobacillus
Source: MDPI journal article supplement (doi:10.3390/antiox11020305), 2022-02-02
Supplement: s1 [file s1]

Article

# Enhancement of the Colorectal Chemopreventive and Immunization Potential of Northern Thai Purple Rice Anthocyanin Using the Biotransformation by $\beta$ -Glucosidase-Producing *Lactobacillus*

Sasithorn Sirilun <sup>1,2</sup>, Chaiyavat Chaiyasut <sup>1,2</sup>, Thanawat Pattananandecha <sup>1,3,4</sup>, Sutasinee Apichai <sup>1,3,4</sup>, Jakkapan Sirithunyalug <sup>1,3</sup>, Busaban Sirithunyalug <sup>1,3,\*</sup> and Chalermpong Saenjum <sup>1,3,4,\*</sup>

<sup>1</sup> Department of Pharmaceutical Sciences, Faculty of Pharmacy, Chiang Mai University, Chiang Mai 50200, Thailand; ssirilun@gmail.com (S.S.); chaiyavat@gmail.com (C.C.); thanawat.pdech@gmail.com (T.P.); sutasinee.apichai@gmail.com (S.A.); jakkapan.s@cmu.ac.th (J.S.)

<sup>2</sup> Innovation Center for Holistic Health, Nutraceuticals and Cosmeceuticals, Faculty of Pharmacy, Chiang Mai University, Chiang Mai 50200, Thailand

<sup>3</sup> Center of Excellence for Innovation in Analytical Science and Technology for Biodiversity-Based Economic and Society (I-ANALY-S-T\_B.BES-CMU), Chiang Mai University, Chiang Mai 50200, Thailand

<sup>4</sup> Multidisciplinary Approaches to Lanna Fermented Foods and Biological Resources Research Unit, Sciences and Technology Research Institute (STSI), Chiang Mai University, Chiang Mai 50200, Thailand

\* Correspondence: busaban.s@cmu.ac.th (B.S.); chalermpong.s@cmu.ac.th (C.S.); Tel.: 66-81-990-7971 (B.S.); +66-89-950-4227 (C.S.)

## Supplementary Materials

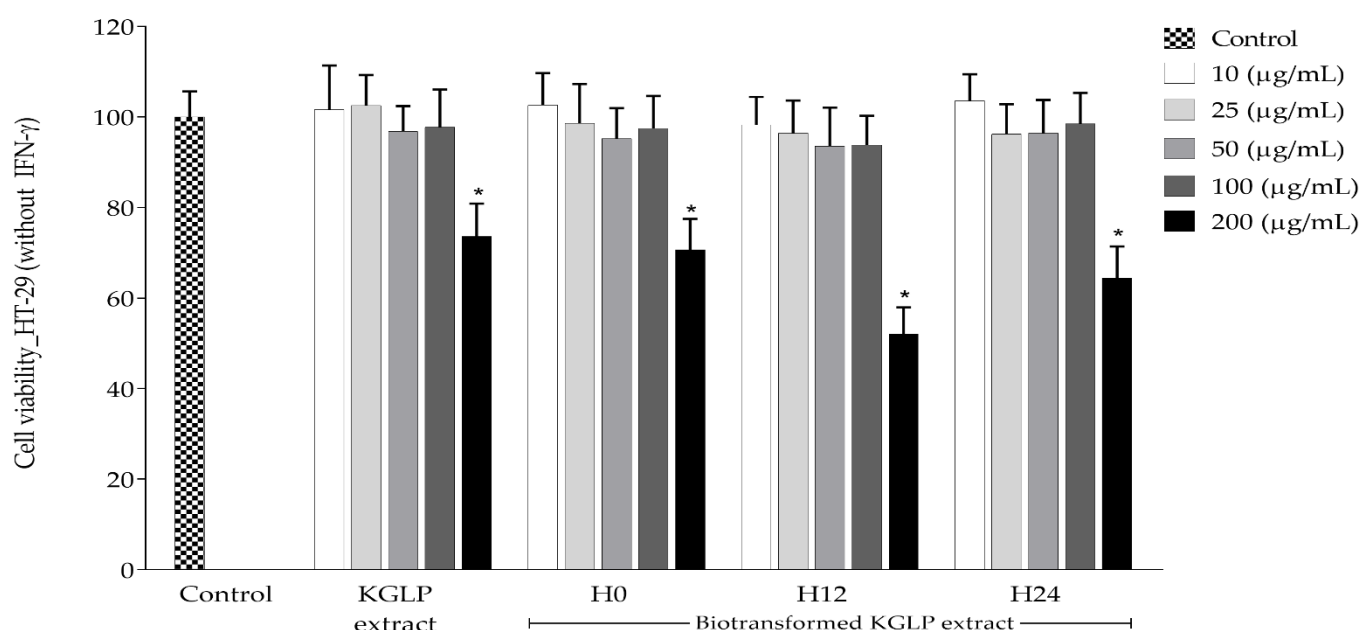

**Figure S1.** Cell viability assessed by the cell proliferation reagent WST-1 in 72 h of HT-29 cultured without IFN- $\gamma$ . \* =  $p < 0.05$ .

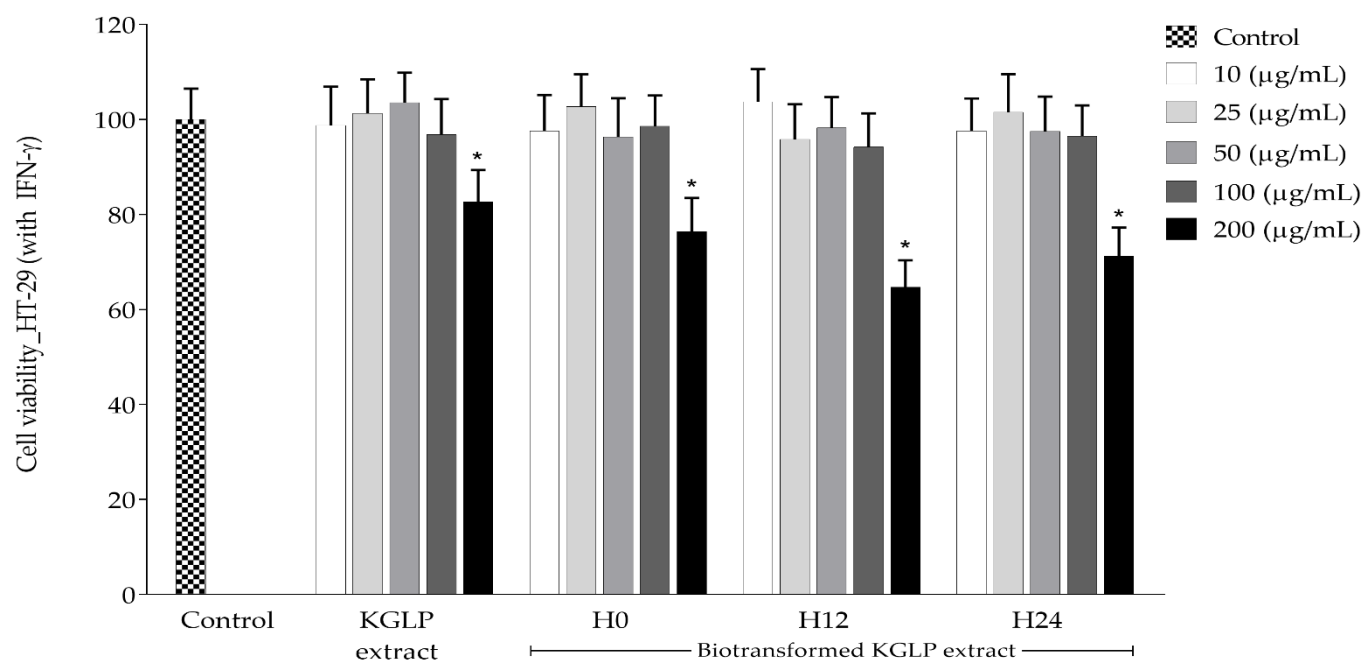

**Figure S2.** Cell viability assessed by the cell proliferation reagent WST-1 in 72 h of HT-29 cultured with IFN- $\gamma$ . \* =  $p < 0.05$ .
